# Supplementary material for: Emotional responses to conspecific distress calls are modulated by affiliation in cockatiels (Nymphicus hollandicus)
Source: PubMed Central journal article supplement (PMC6177178; doi:10.1371/journal.pone.0205314), 2018-10-09
Supplement: pone.0205314.s002.pdf [file pone.0205314.s002.pdf]

**Table S1. Randomization of conditions depending on the subjects and the days of testing.** P: Partner, NP: Non-partner, WN: White Noise.

| <b>Days of testing</b><br><b>Subjects</b> | <b>Day 1</b> | <b>Day 2</b> | <b>Day 3</b> |
|-------------------------------------------|--------------|--------------|--------------|
| <b>Callisto</b>                           | NP           | WN           | P            |
| <b>Hermes</b>                             | WN           | P            | NP           |
| <b>Nephtys</b>                            | P            | NP           | WN           |
| <b>Seth</b>                               | WN           | P            | NP           |
| <b>Sita</b>                               | P            | NP           | WN           |
| <b>Viviane</b>                            | WN           | P            | NP           |
| <b>Wala</b>                               | NP           | WN           | P            |
| <b>Loki</b>                               | NP           | WN           | P            |
| <b>Odin</b>                               | P            | NP           | WN           |
| <b>Skadi</b>                              | WN           | P            | NP           |
