# Supplementary material for: Emotional responses to conspecific distress calls are modulated by affiliation in cockatiels (Nymphicus hollandicus)
Source: PubMed Central journal article supplement (PMC6177178; doi:10.1371/journal.pone.0205314), 2018-10-09
Supplement: pone.0205314.s004.pdf [file pone.0205314.s004.pdf]

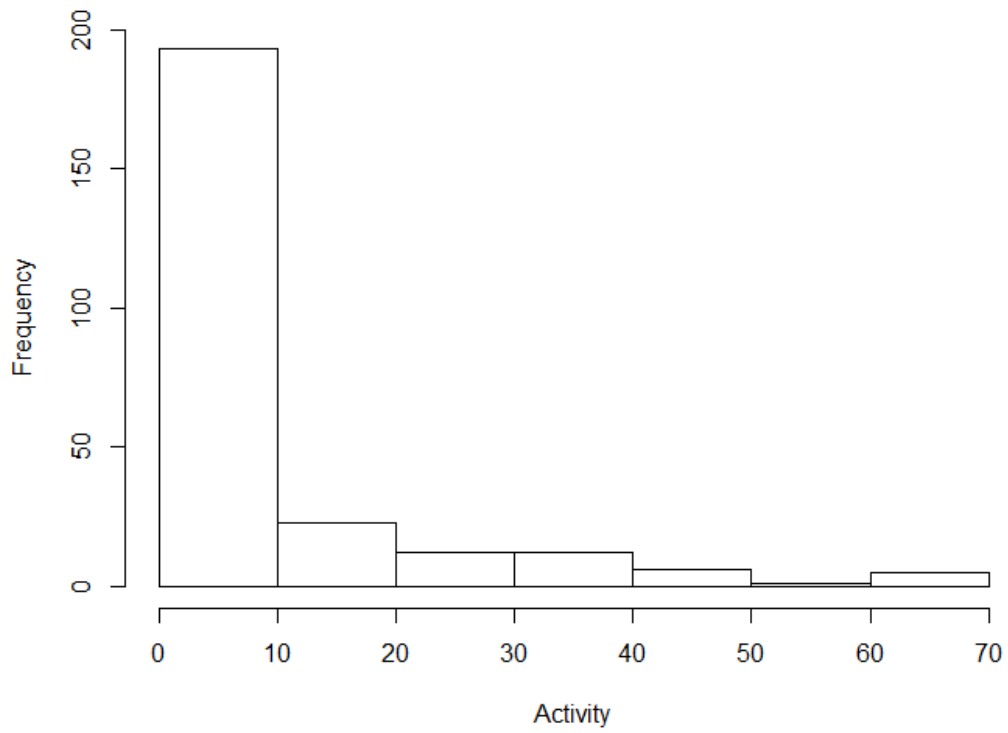

**Figure S2. Histogram of activity, i.e. number of zone changes, during a phase.** Results from all type of phases (before, during, after) and all type of calls (partner, non-partner, white noise) are pooled.

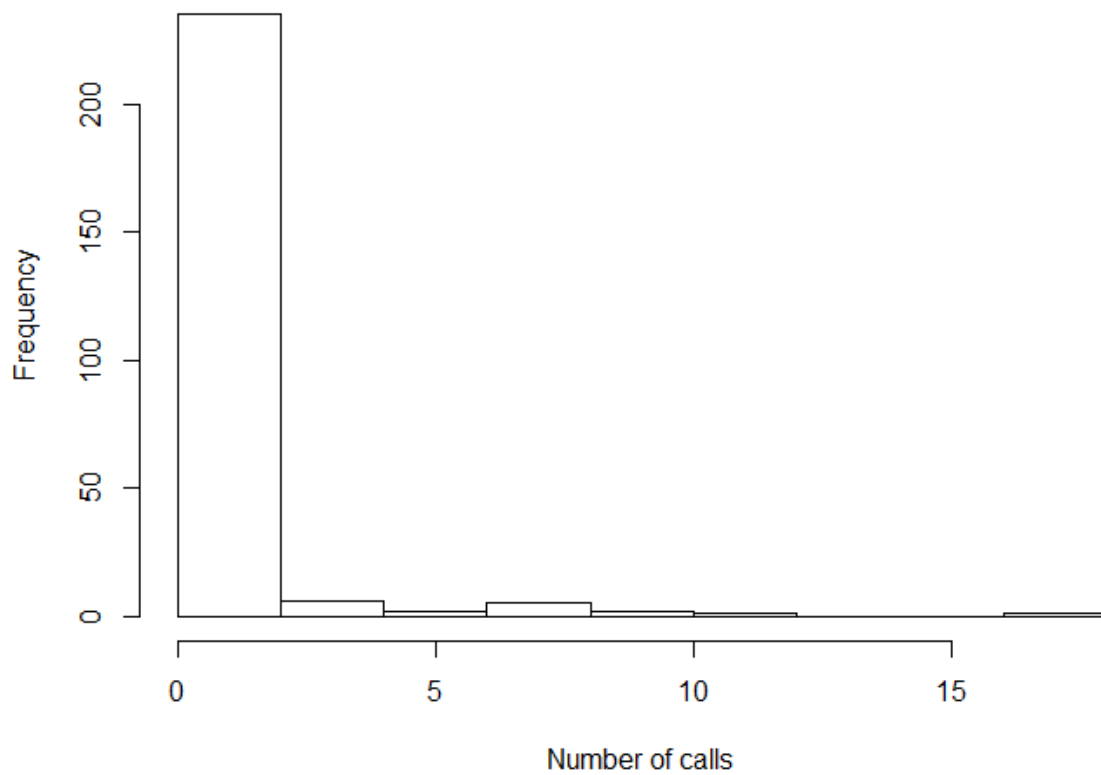

**Figure S3. Histogram of number of calls emitted during a phase.** Results from all type of phases (before, during, after) and all type of calls (partner, non-partner, white noise) are pooled.

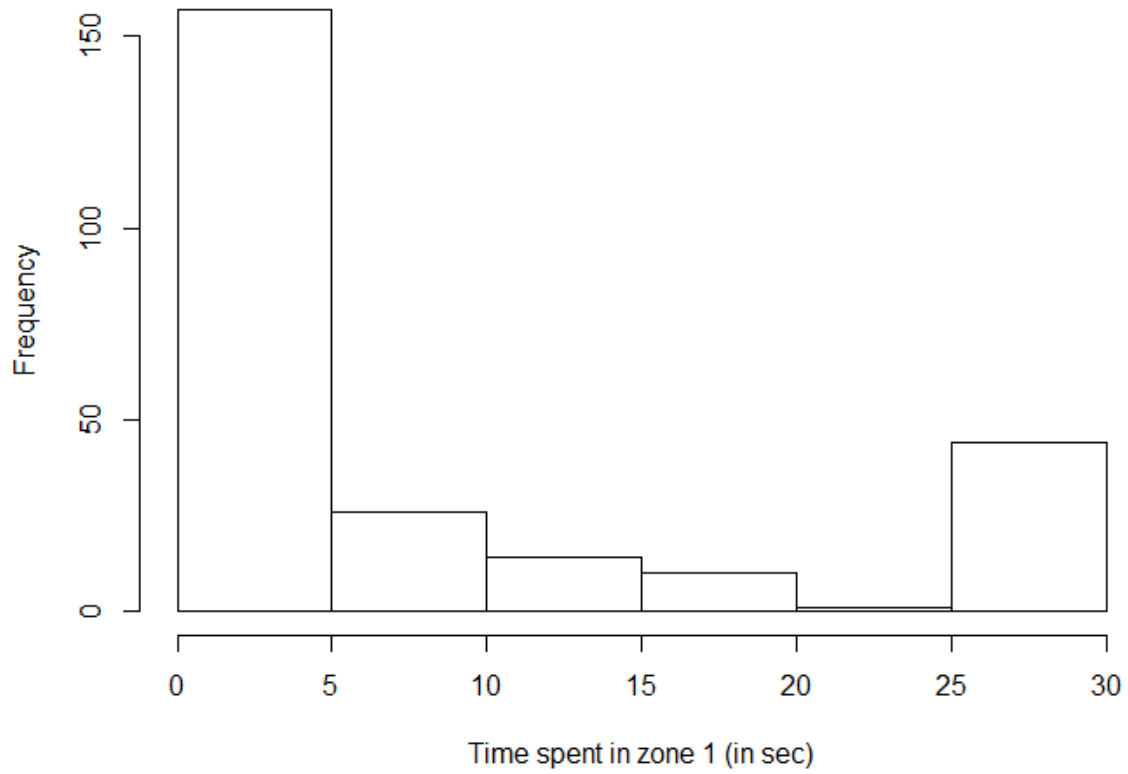

**Figure S4. Histogram of time spent in zone 1, i.e. near the loudspeaker, during a phase (max. 30 seconds).** Results from all type of phases (before, during, after) and all type of calls (partner, non-partner, white noise) are pooled.

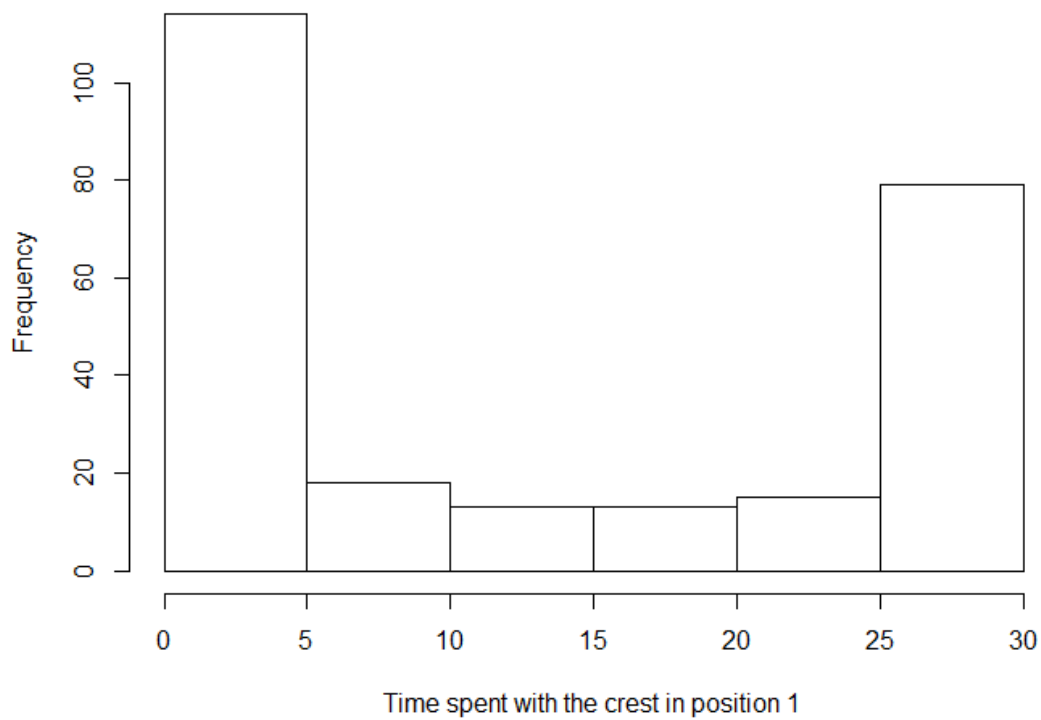

**Figure S5. Histogram of time spent with crest in position 1, i.e. erected, during a phase (max. 30 seconds).** Results from all type of phases (before, during, after) and all type of calls (partner, non-partner, white noise) are pooled.
